# Supplementary material for: Low band-gap benzothiadiazole conjugated microporous polymers
Source: Royal Society of Chemistry journal article supplement (doi:10.1039/c3py00690e), 2013-01-01
Supplement: c3py00690e.pdf [file c3py00690e.pdf]

## Supporting Information

### Low Band Gap Conjugated Microporous Polymers

Shijie Ren,<sup>a,b</sup> Robert Dawson,<sup>b</sup> Dave J. Adams,<sup>b</sup> Andrew I. Cooper<sup>b</sup>

<sup>a</sup> College of Polymer Science and Engineering, Sichuan University, Chengdu, 610065, China.

<sup>b</sup> Department of Chemistry and Centre for Materials Discovery, University of Liverpool, Crown Street, Liverpool, L69 7ZD, U.K; E-mail: aicooper@liv.ac.uk

#### IR spectra of the BCMP networks

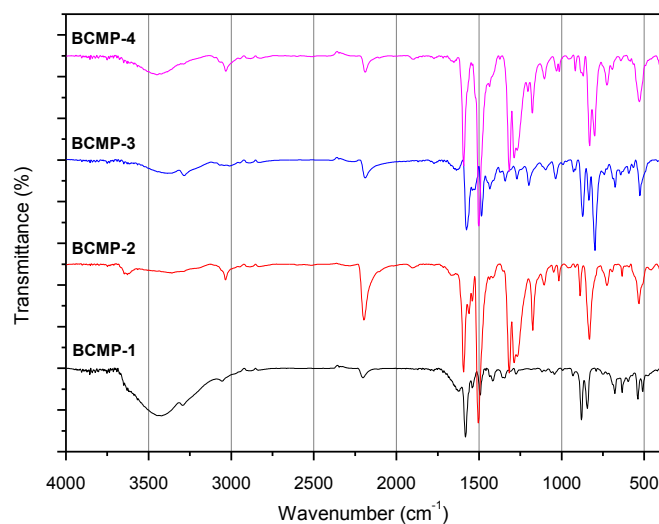

**Fig. S1.** IR spectra of BCMP-1-BCMP-4.

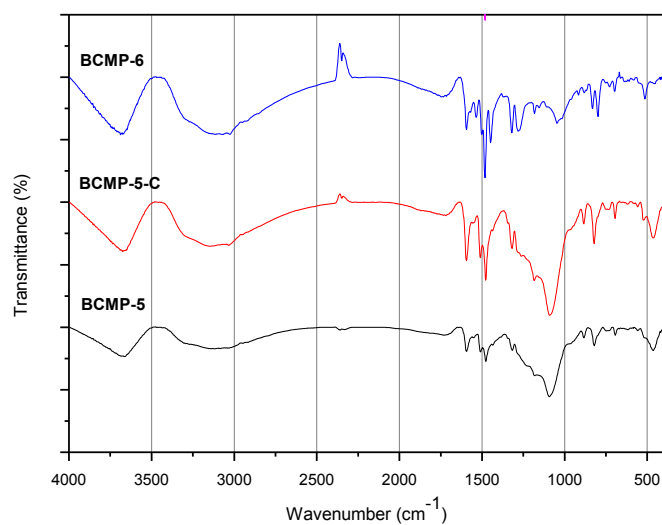

**Fig. S2.** IR spectra of **BCMP-5**, **BCMP-5-C** and **BCMP-6**.

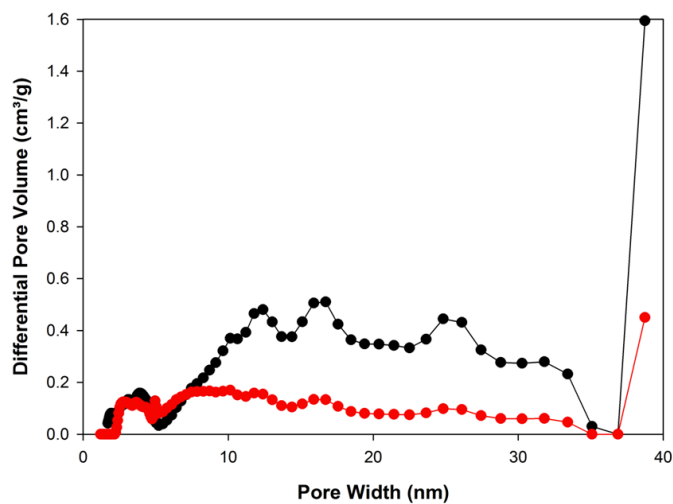

**Fig. S3.** Pore size distributions for **BCMP-5** and **BCMP-5-C**.

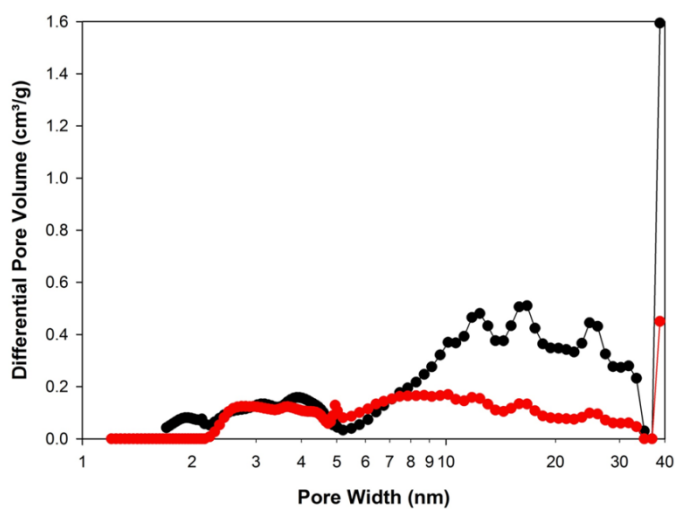

**Fig. S4.** Pore size distributions for **BCMP-5** and **BCMP-5-C** as shown on a log scale.

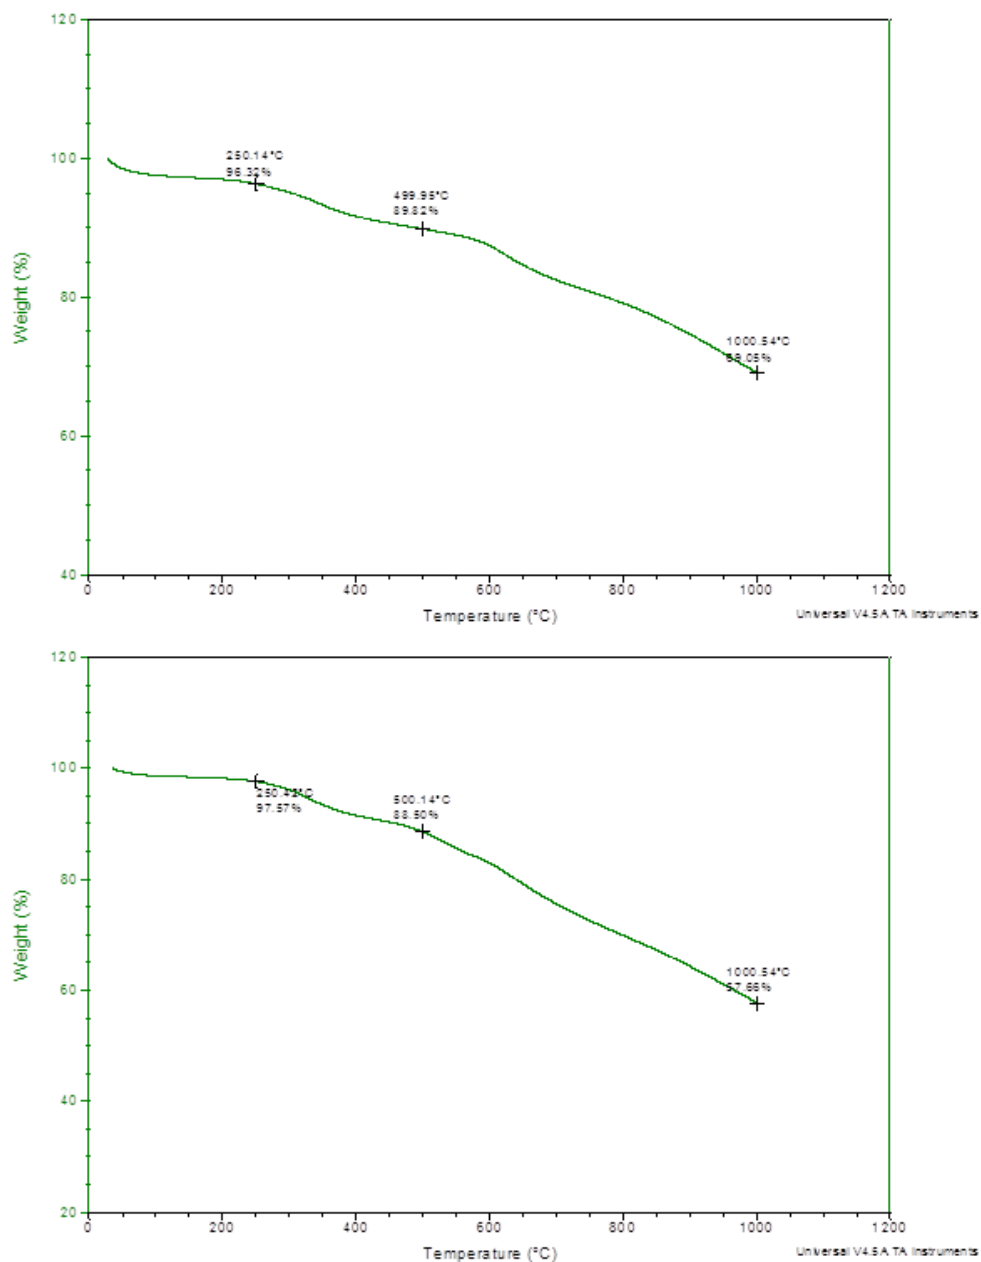

**Fig. S5.** TGA analysis of **BCMP-5** (top) and **BCMP-5-C** (bottom). Data collected by heating at 5 °C/min under a nitrogen atmosphere.
